# Supplementary material for: Transcriptome Analysis of Syringa oblata Lindl. Inflorescence Identifies Genes Associated with Pigment Biosynthesis and Scent Metabolism
Source: PubMed Central journal article supplement (PMC4654506; doi:10.1371/journal.pone.0142542), 2015-11-20

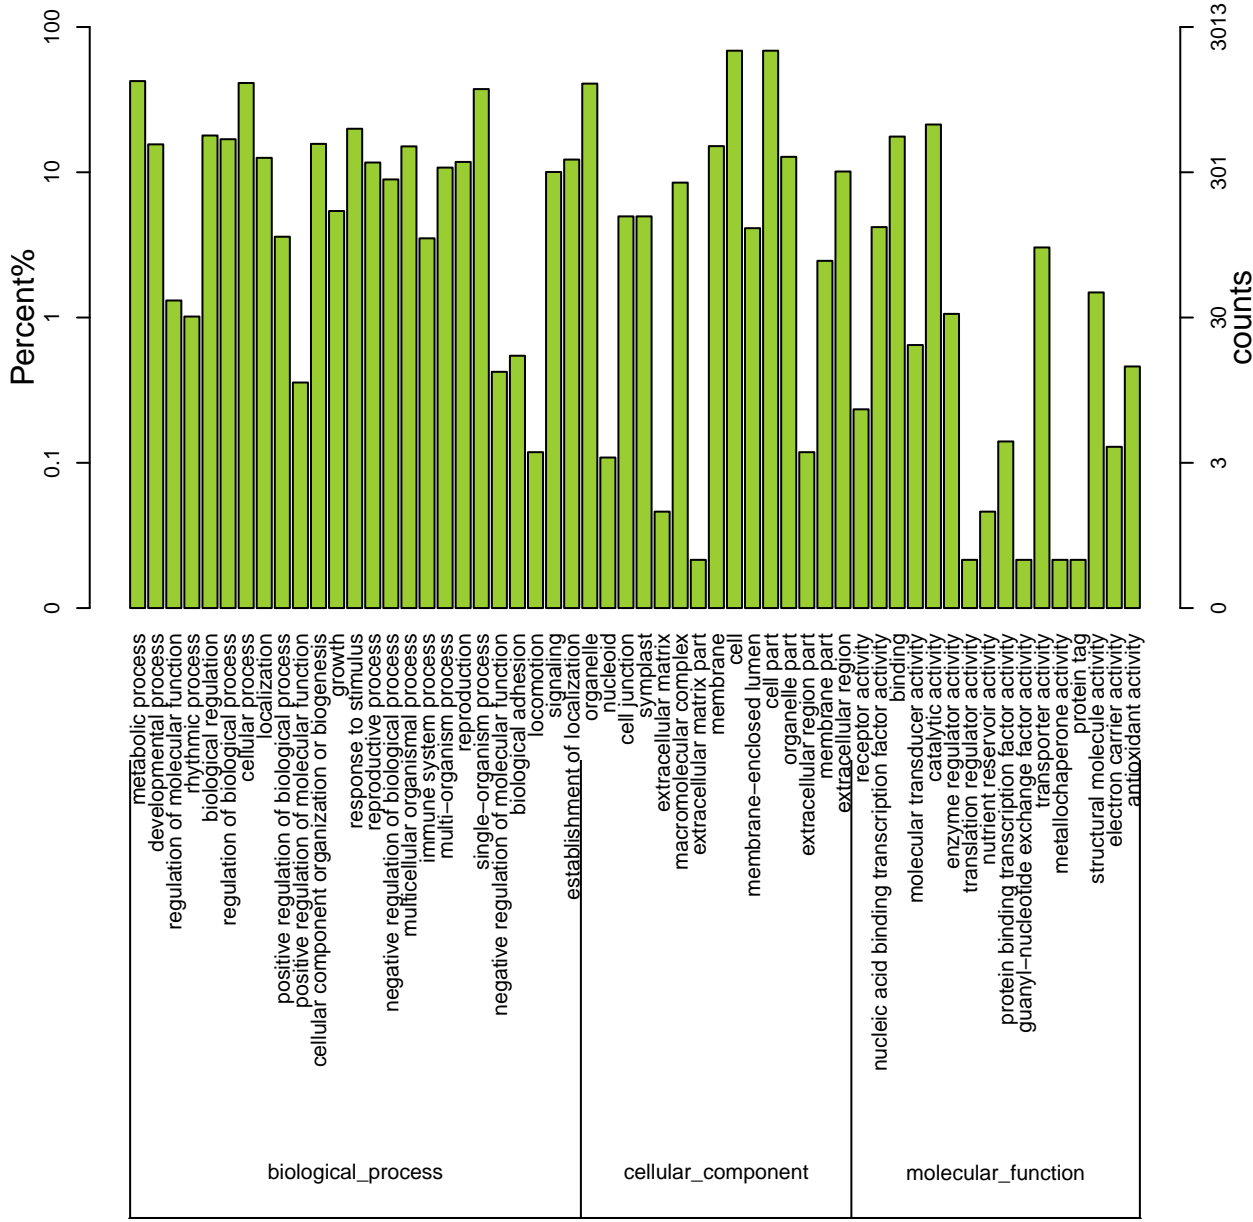

Supplement: pone.0142542.s015.pdf [file pone.0142542.s015.pdf]
